# Supplementary material for: Tim-4 internalizes apoptotic cells through Axl-mediated signal transduction
Source: Research Square preprint supplement (doi:10.21203/rs.3.rs-7580891/v1), 2025-10-16
Supplement: Supplementary file 1 [file ad138619edbc817c69170418.docx]

**Supplementary Figures**

**Tim-4 internalizes apoptotic cells through Axl-mediated signal transduction**

Byeongjin Moon1, §, Jaeseon Jeon1, §, Eunhye Oh1, Jinwook Han1, Juyeon Lee1, Eojin Hwang1, Chang Sup Lee2, Dongtak Jeong3, Daeho Park1, *

*1. School of Life Sciences, Gwangju Institute of Science and Technology, Gwangju 61005, Korea*

*2. College of Pharmacy and Research Institute of Pharmaceutical Sciences, Gyeongsang National University, Jinju 52828, Korea*
*3. Department of Molecular and Life Science, College of Science and Convergence Technology, Hanyang University ERICA Campus, Ansan 15588, Korea.*

§ These authors contributed equally to this work.

**Running title: Axl relays signals for Tim-4-mediated efferocytosis**

*** Correspondence to**

Daeho Park

School of Life Sciences

Gwangju Institute of Science and Technology

Gwangju 61005, Korea

Tel.: 82-62-715-2890

Fax: 82-62-715-2484

E-mail: [daehopark@gist.ac.kr](mailto:daehopark@gist.ac.kr)

**
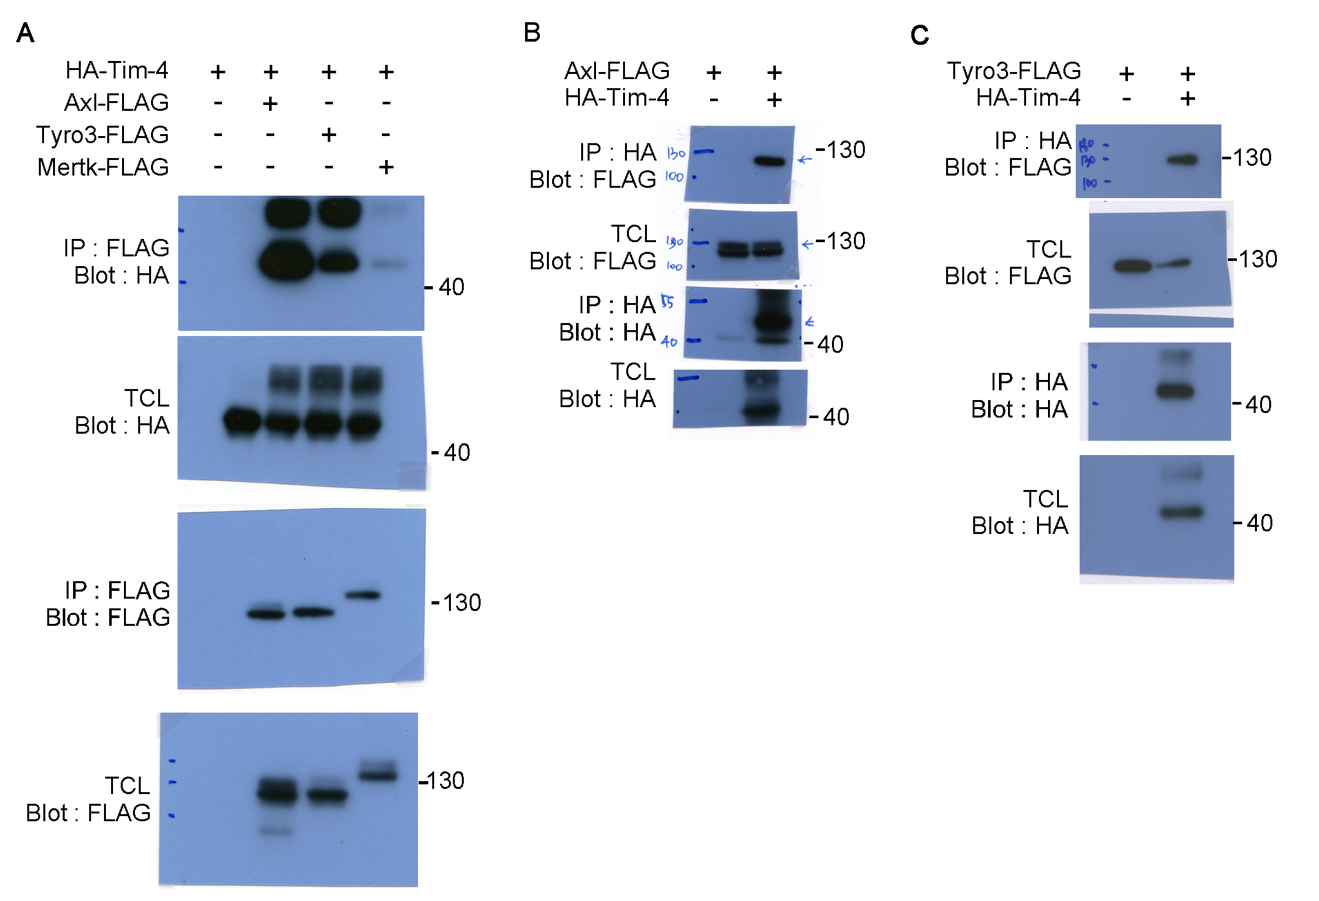
**

**Supplementary Figure 1. Full western blots used in Fig. 1**

**A**-**B** Original western blots for Fig. 1B (**A**), Fig. 1C (**B**), and Fig. 1D (**C**)


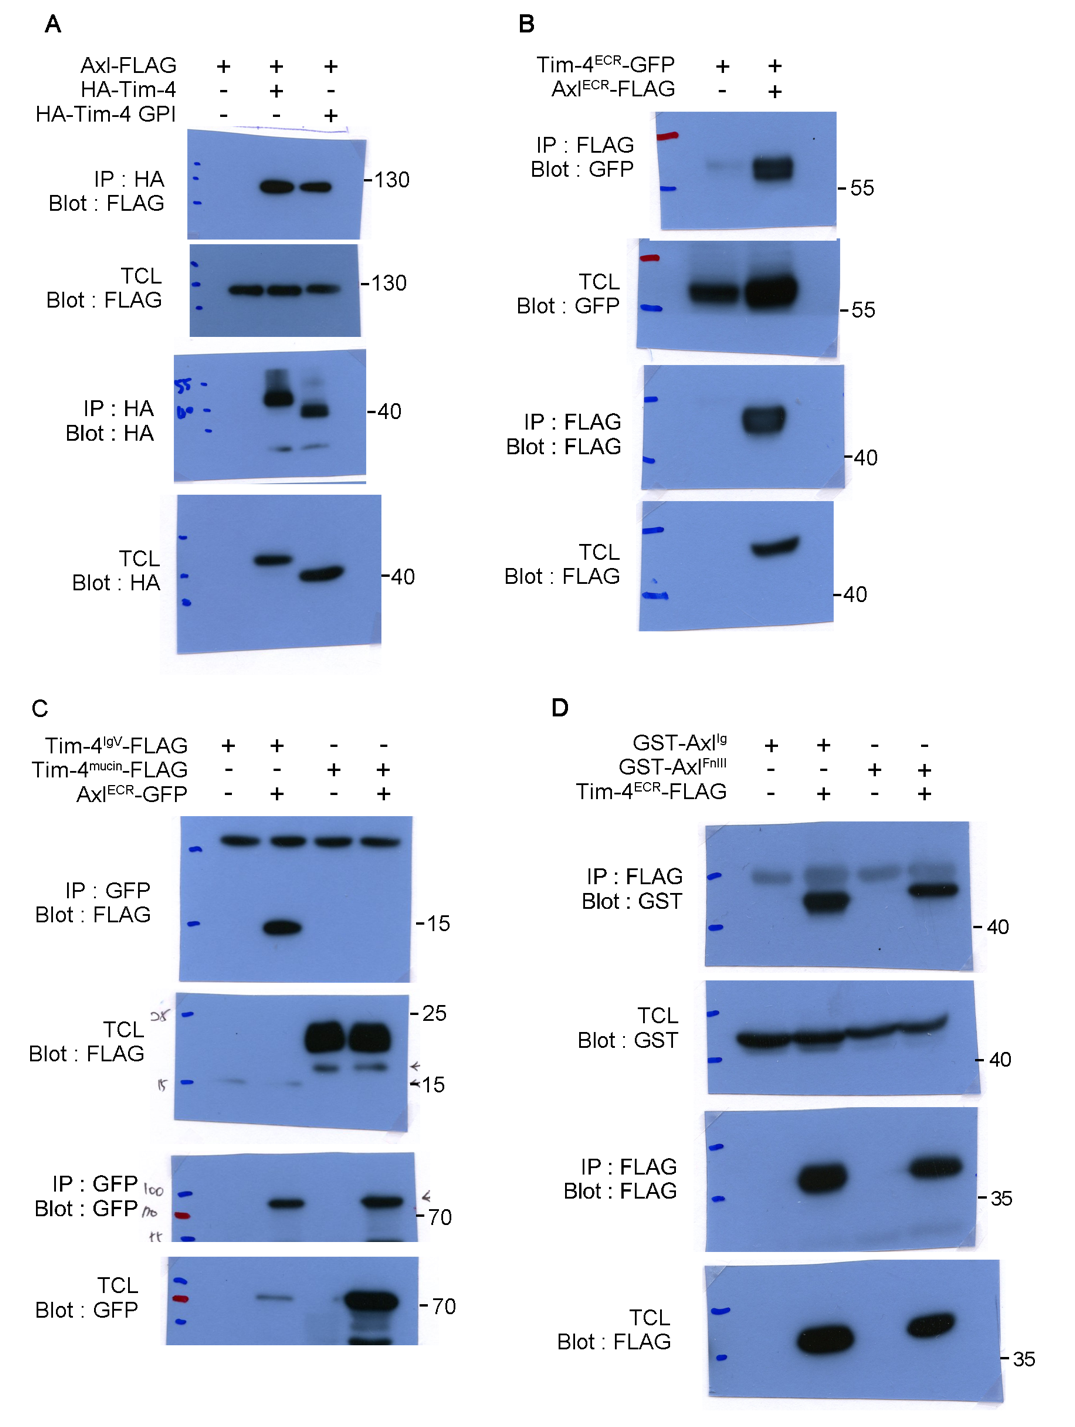


**Supplementary Figure 2. Full western blots used in Fig. 2**

**A**-**D** Original western blots for Fig. 2C (**A**), Fig. 2D (**B**), Fig. 2E (**C**), and Fig. 2F (**D**)

**
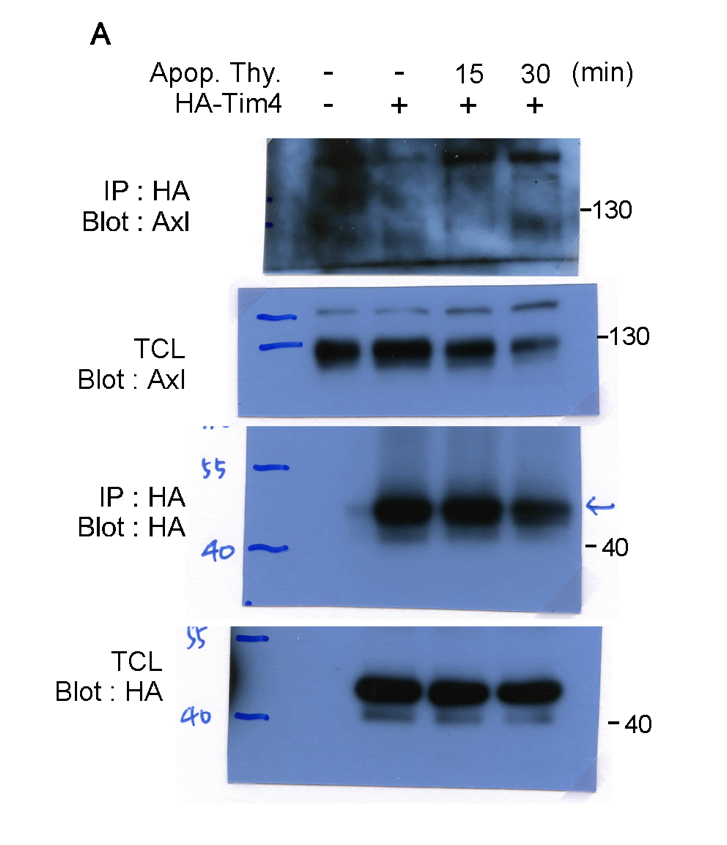
**

**Supplementary Figure 3. Full western blots used in Fig. 3**

**A** Original western blots for Fig. 3A


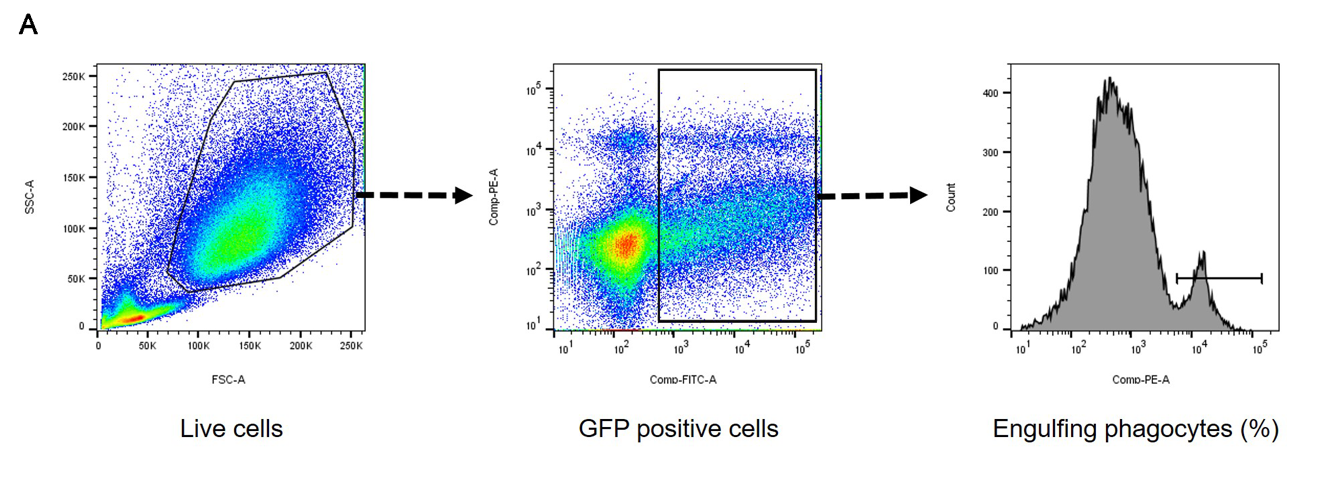


**Supplementary Figure 4. Representative gating strategy for the efferocytosis assay**

**A** To gate for engulfing phagocytes, we first gated live cells using a forward scatter (FSC) and side scatter (SSC) dot plot. We then gated the GFP-positive cells. Among these, cells that were also TMRM-positive or pHrodo-positive were considered phagocytes that ingested apoptotic cells.

**
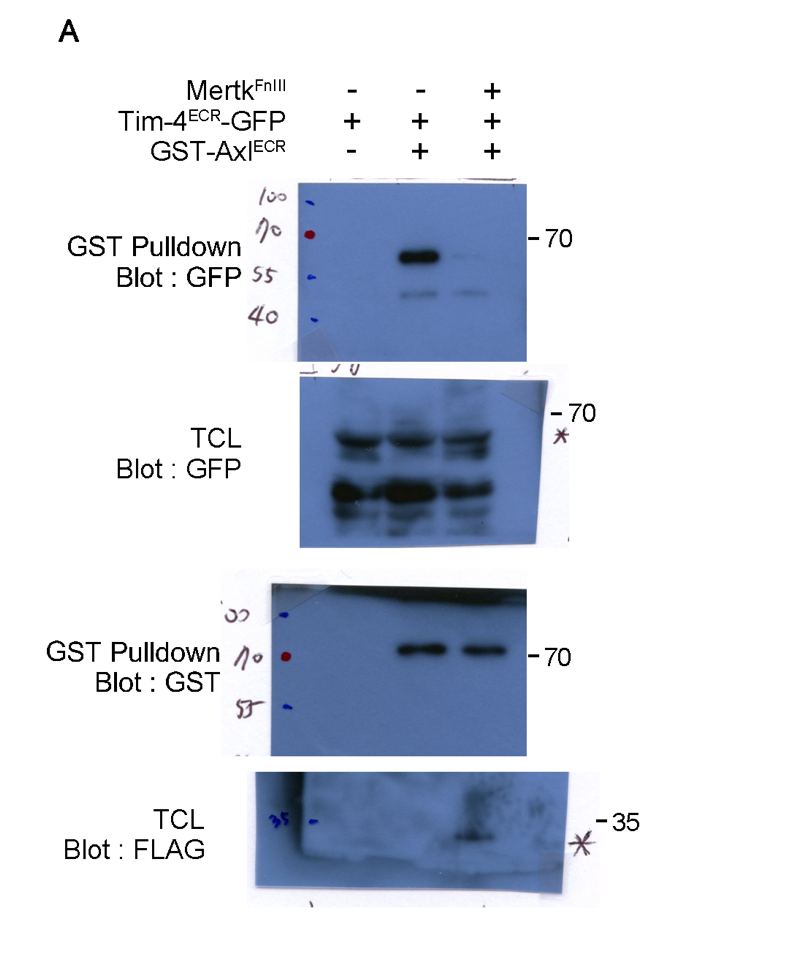
**

**Supplementary Figure 5. Full western blots used in Fig. 4**

**A** Original western blots for Fig. 4A
